# Supplementary material for: New oxovanadium(iv) complexes with pincer ligand obtained in situ: experimental and theoretical studies on the structure, spectroscopic properties and antitumour activity
Source: Royal Society of Chemistry journal article supplement (doi:10.1039/c5ra12561h), 2015-01-01
Supplement: c5ra12561h1.pdf [file c5ra12561h1.pdf]

## Supplementary Data

(Figures S1-S2 and Tables S1).

**Table S1** HOMO and LUMO energy values (in eV) calculated by DFT method

| Parameters                         | Compound | B3LYP/LanL2DZ                 |
|------------------------------------|----------|-------------------------------|
| $E_{\text{total}}$ (hartree)       | <b>1</b> | -1095                         |
|                                    | <b>2</b> | -1367                         |
| HOMO energy (eV)                   | <b>1</b> | -5.42 ( $\alpha$ -spin, SOMO) |
|                                    | <b>2</b> | -5.55 ( $\alpha$ -spin, SOMO) |
| LUMO energy (eV)                   | <b>1</b> | -1.77                         |
|                                    | <b>2</b> | -1.88                         |
| $\Delta E_{\text{HOMO-LUMO}}$ (eV) | <b>1</b> | 3.65                          |
|                                    | <b>2</b> | 3.67                          |

1 hartree = 627.5095 kcal/mol = 27.2116 eV

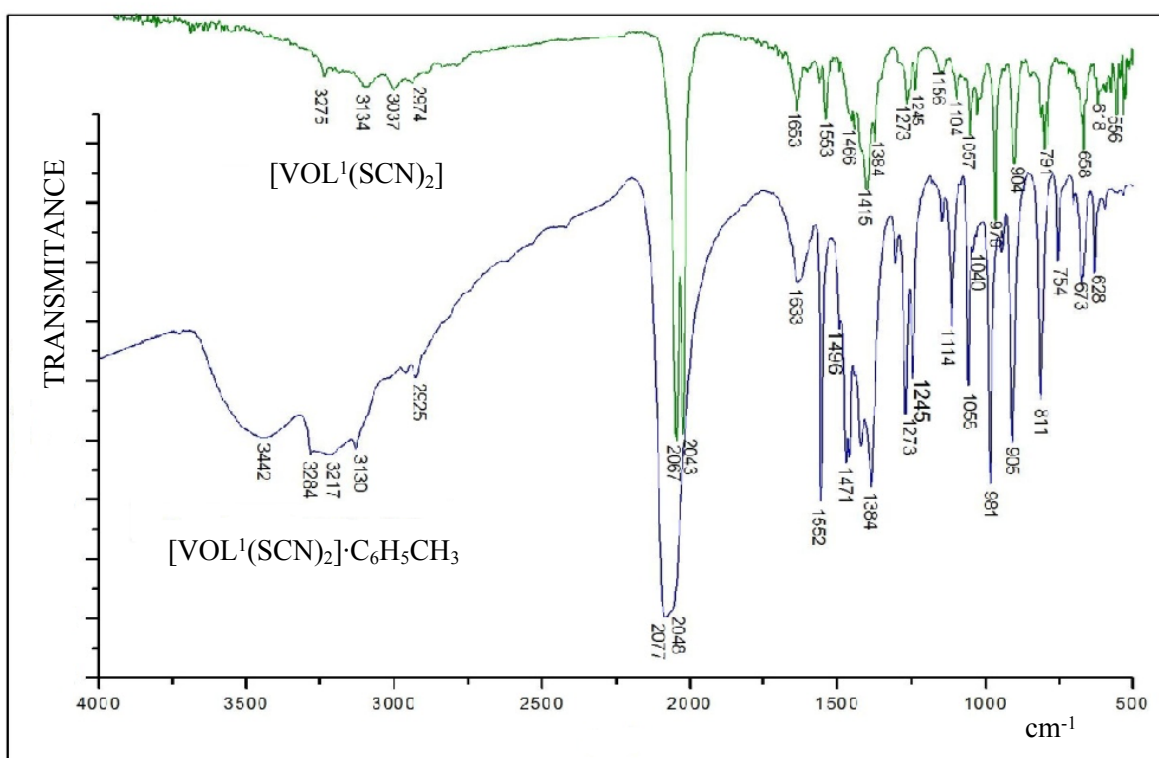

**Fig S1** . Experimental infrared absorption spectra of  $[\text{VOL}^1(\text{SCN})_2]$  (**1**) and  $\text{VOL}^1(\text{SCN})_2 \cdot \text{C}_6\text{H}_5\text{CH}_3$  (**2**).

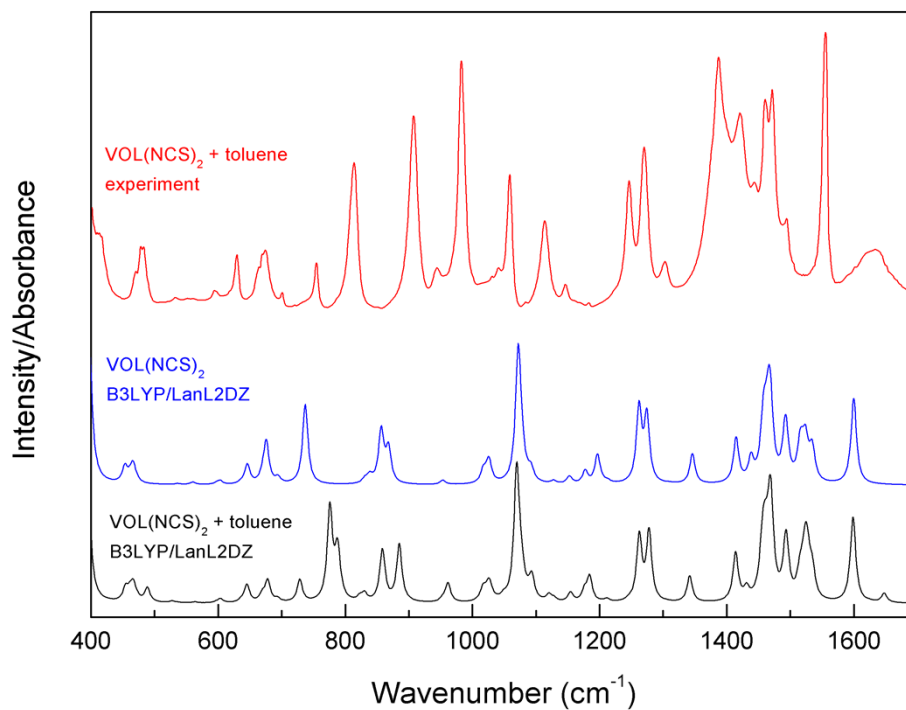

**Fig. S2** The calculated infrared absorption spectra of **1** (blue) and **2** (black) together with the experimental spectrum of **2** (red). The spectra were vertically offset for clarity.

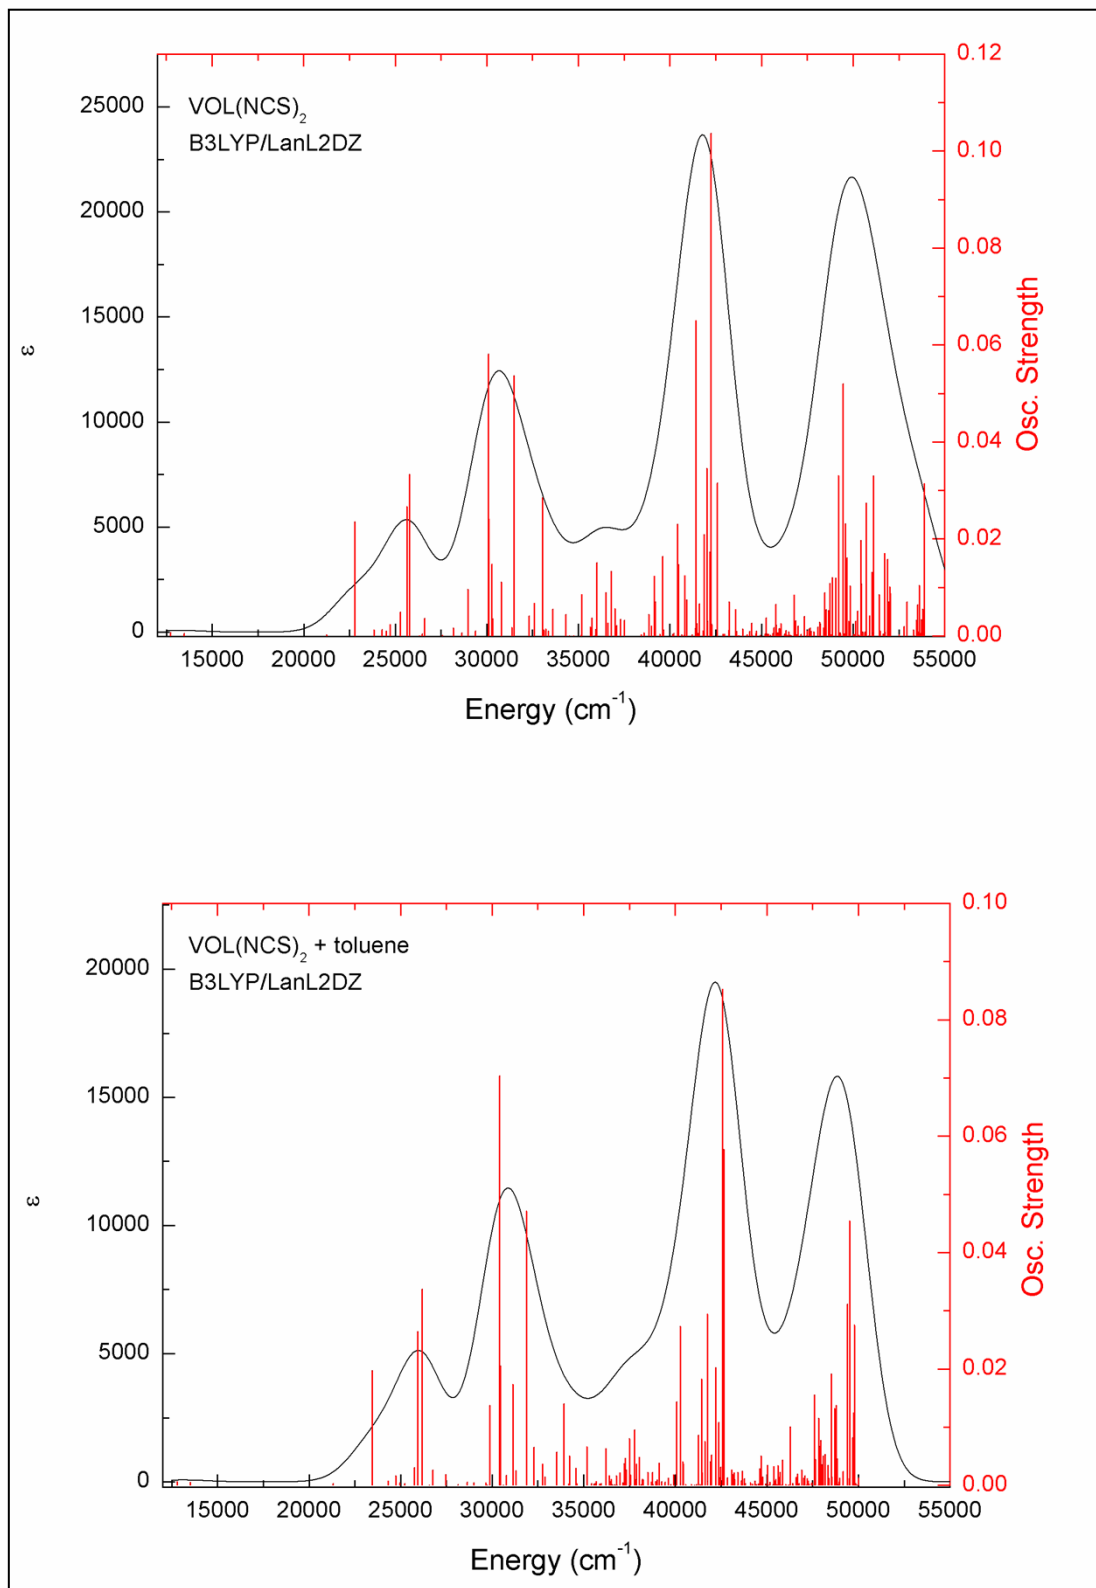

**Fig. S3.** Calculated transitions (red colour, right scale) with the convoluted electronic absorption spectrum (black colour, left scale) of **1** and **2**. Theory level: B3LYP/LanL2DZ.
